# Supplementary material
Source: Springer Nature journal article supplement (https://www.springermedizin.de/resource/supplementary/12889_2013_6814_MOESM6_ESM.pdf/9499042)
Supplement: MOESM6 [file 9499042]

**Table 5: Risk of total low-risk HPV, high-risk HPV and multiple HPV infections, among Nigerian women**

| <b>HPV type</b>                        | <b>PR (95% CI)</b> | <b>P-value</b> |
|----------------------------------------|--------------------|----------------|
| REF = Younger women aged 18 – 36 years |                    |                |
| <b>Any HPV</b>                         | 0.65 (0.49, 0.86)  | 0.001          |
| <b>Any lrHPV</b>                       | 0.59 (0.41, 0.85)  | 0.001          |
| <b>Any hrHPV</b>                       | 0.58 (0.41, 0.84)  | <0.001         |
| <b>Any multiple HPV</b>                | 0.39 (0.22, 0.68)  | <0.001         |
| <b>Multiple lrHPV</b>                  | 0.36 (0.15, 0.87)  | 0.002          |
| <b>Multiple hrHPV</b>                  | 0.49 (0.25, 0.99)  | 0.01           |
